# Supplementary material
Source: publisher site journal article supplement (https://www.spandidos-publications.com/7242/downloadSupplementary)
Supplement: Supplementary file 1 [file downloadSupplementary]

## Sheet: proteinGroups_R409H
Table SI. Results of the mass spectrometry analysis.
proteinGroups_R409H
Protein IDs	sp|Pendrin(SLC26A4)R409H|											Oxidation (M) site positions	Taxonomy IDs
Majority protein IDs	sp|Pendrin(SLC26A4)R409H|										77;329;537;546;681	21;461;463;775	-1
Peptide counts (all)	27
Peptide counts (razor + unique)	27
Peptide counts (unique)	27
Fasta headers	sp|Pendrin (SLC26A4) R409H|
Number of proteins	1
Peptides	27
Razor + unique peptides	27
Unique peptides	27
Peptides MG132-1	27
Peptides MG132-2	27
Peptides Vehicle-1	17
Peptides Vehicle-2	18
Razor + unique peptides MG132-1	27
Razor + unique peptides MG132-2	27
Razor + unique peptides Vehicle-1	17
Razor + unique peptides Vehicle-2	18
Unique peptides MG132-1	27
Unique peptides MG132-2	27
Unique peptides Vehicle-1	17
Unique peptides Vehicle-2	18
Sequence coverage [%]	39.1
Unique + razor sequence coverage [%]	39.1
Unique sequence coverage [%]	39.1
Mol. weight [kDa]	85.703
Sequence length	780
Sequence lengths	780
Q-value	0
Score	323.31
Identification type MG132-1	By MS/MS
Identification type MG132-2	By MS/MS
Identification type Vehicle-1	By MS/MS
Identification type Vehicle-2	By MS/MS
Sequence coverage MG132-1 [%]	39.1
Sequence coverage MG132-2 [%]	39.1
Sequence coverage Vehicle-1 [%]	24.5
Sequence coverage Vehicle-2 [%]	27.3
Intensity	89529000000
Intensity MG132-1	59719000000
Intensity MG132-2	21809000000
Intensity Vehicle-1	3239900000
Intensity Vehicle-2	4761500000
iBAQ peptides	24
iBAQ	3730400000
iBAQ MG132-1	2488300000
iBAQ MG132-2	908690000
iBAQ Vehicle-1	134990000
iBAQ Vehicle-2	198400000
LFQ intensity MG132-1	58096000000
LFQ intensity MG132-2	49073000000
LFQ intensity Vehicle-1	6403100000
LFQ intensity Vehicle-2	12669000000
MS/MS count MG132-1	129
MS/MS count MG132-2	90
MS/MS count Vehicle-1	33
MS/MS count Vehicle-2	42
MS/MS count	294
Only identified by site
Reverse
Potential contaminant
id	43
Peptide IDs	44;45;55;79;80;95;113;133;137;156;157;195;196;210;211;212;219;257;284;292;293;308;309;332;339;341;363
Peptide is razor	True;True;True;True;True;True;True;True;True;True;True;True;True;True;True;True;True;True;True;True;True;True;True;True;True;True;True
Mod. peptide IDs	45;46;60;86;87;102;103;104;122;144;148;168;169;209;210;211;229;230;231;238;277;278;305;314;315;330;331;357;358;366;368;391
Evidence IDs	169;170;171;172;173;174;175;241;242;388;389;390;391;392;393;394;395;396;397;398;399;400;401;402;403;404;405;478;479;480;481;482;483;484;485;486;487;488;489;490;491;492;493;494;495;496;497;498;499;500;501;502;503;504;505;506;507;508;509;510;511;512;513;514;515;516;517;518;614;615;738;739;740;741;742;743;757;758;846;847;848;849;850;851;852;853;854;855;856;857;858;859;860;861;862;863;1055;1056;1057;…
MS/MS IDs	173;174;175;176;177;178;179;246;247;441;442;443;444;445;446;447;448;449;450;451;452;453;454;455;456;457;458;459;460;461;462;534;535;536;537;538;539;540;541;542;543;544;545;546;547;548;549;550;551;552;553;554;555;556;557;558;559;560;561;562;563;564;565;566;567;568;569;570;571;572;674;675;804;805;806;807;808;809;822;823;929;930;931;932;933;934;935;936;937;938;939;940;941;942;943;944;945;946;947;948…
Best MS/MS	174;176;246;446;459;549;674;808;822;933;962;1189;1205;1307;1310;1322;1357;1607;1753;1820;1842;1956;1966;2528;2571;2598;2785
GlyGly (K) site IDs	0;1;2;3;4
Oxidation (M) site IDs	29;30;31;32
GlyGly (K) site positions	77;329;537;546;681
Oxidation (M) site positions	21;461;463;775
Taxonomy IDs	-1

## Sheet: peptides_R409H
peptides_R409H
Sequence	N-term cleavage window	C-term cleavage window	Amino acid before	First amino acid	Second amino acid	Second last amino acid	Last amino acid	Amino acid after	A Count	R Count	N Count	D Count	C Count	Q Count	E Count	G Count	H Count	I Count	L Count	K Count	M Count	F Count	P Count	S Count	T Count	W Count	Y Count	V Count	U Count	O Count	Length	Missed cleavages	Mass	Proteins	Leading razor protein	Start position	End position	Unique (Groups)	Unique (Proteins)	Charges	PEP	Score	Identification type MG132-1	Identification type MG132-2	Identification type Vehicle-1	Identification type Vehicle-2	Experiment MG132-1	Experiment MG132-2	Experiment Vehicle-1
DTFFLTVHDAILYLQNQVK	EKLEQCGFFDDNIRKDTFFLTVHDAILYLQ	LTVHDAILYLQNQVKSQEGQGSILETITLI	K	D	T	V	K	S	1	0	1	2	0	2	0	0	1	1	3	1	0	2	0	0	2	0	1	2	0	0	19	0	2264.18	sp|Pendrin(SLC26A4)R409H|	sp|Pendrin(SLC26A4)R409H|	716	734	yes	yes	2;3	1.7551e-191	170.95	By MS/MS	By MS/MS			2	1
DTLELIETELTEEELDVQDEAMR	QGSILETITLIQDCKDTLELIETELTEEEL	ELTEEELDVQDEAMRTLAS___________	K	D	T	M	R	T	1	1	0	3	0	1	7	0	0	1	4	0	1	0	0	0	3	0	0	1	0	0	23	0	2720.26	sp|Pendrin(SLC26A4)R409H|	sp|Pendrin(SLC26A4)R409H|	754	776	yes	yes	3	2.6448e-71	129.77	By MS/MS	By MS/MS	By MS/MS	By MS/MS	1	1	1
EIEIQVDWNSELPVK	DEDIEDLEELDIPTKEIEIQVDWNSELPVK	EIEIQVDWNSELPVKVNVPKVPIHSLVLDC	K	E	I	V	K	V	0	0	1	1	0	1	3	0	0	2	1	1	0	0	1	1	0	1	0	2	0	0	15	0	1797.91	sp|Pendrin(SLC26A4)R409H|	sp|Pendrin(SLC26A4)R409H|	633	647	yes	yes	2	4.2295e-80	146.16	By MS/MS	By MS/MS			1	1
FSSPIFYGNVDGFK	NYKNIEEPQGVKILRFSSPIFYGNVDGFKK	RFSSPIFYGNVDGFKKCIKSTVGFDAIRVY	R	F	S	F	K	K	0	0	1	1	0	0	0	2	0	1	0	1	0	3	1	2	0	0	1	1	0	0	14	0	1576.76	sp|Pendrin(SLC26A4)R409H|	sp|Pendrin(SLC26A4)R409H|	550	563	yes	yes	2;3	4.5659e-108	159.12	By MS/MS	By MS/MS	By MS/MS	By MS/MS	2	2	3
FSSPIFYGNVDGFKK	NYKNIEEPQGVKILRFSSPIFYGNVDGFKK	FSSPIFYGNVDGFKKCIKSTVGFDAIRVYN	R	F	S	K	K	C	0	0	1	1	0	0	0	2	0	1	0	2	0	3	1	2	0	0	1	1	0	0	15	1	1704.85	sp|Pendrin(SLC26A4)R409H|	sp|Pendrin(SLC26A4)R409H|	550	564	yes	yes	3	8.837e-66	136.6	By MS/MS	By MS/MS	By MS/MS	By MS/MS	2	2	2
GMFMQLCDIPR	LQKSVLAAVVIANLKGMFMQLCDIPRLWRQ	ANLKGMFMQLCDIPRLWRQNKIDAVIWVFT	K	G	M	P	R	L	0	1	0	1	1	1	0	1	0	1	1	0	2	1	1	0	0	0	0	0	0	0	11	0	1366.62	sp|Pendrin(SLC26A4)R409H|	sp|Pendrin(SLC26A4)R409H|	460	470	yes	yes	2	2.5688e-102	161.92	By MS/MS	By MS/MS	By MS/MS	By MS/MS	13	12	9
IDVNVYFASLQDYVIEK	VGVRSLRVIVKEFQRIDVNVYFASLQDYVI	VNVYFASLQDYVIEKLEQCGFFDDNIRKDT	R	I	D	E	K	L	1	0	1	2	0	1	1	0	0	2	1	1	0	1	0	1	0	0	2	3	0	0	17	0	2015.03	sp|Pendrin(SLC26A4)R409H|	sp|Pendrin(SLC26A4)R409H|	686	702	yes	yes	2	4.4002e-33	108.17	By MS/MS	By MS/MS			1	1
IVLNVSTK	FTTAAAFQVLVSQLKIVLNVSTKNYNGVLS	VLVSQLKIVLNVSTKNYNGVLSIIYTLVEI	K	I	V	T	K	N	0	0	1	0	0	0	0	0	0	1	1	1	0	0	0	1	1	0	0	2	0	0	8	0	872.533	sp|Pendrin(SLC26A4)R409H|	sp|Pendrin(SLC26A4)R409H|	238	245	yes	yes	2	5.044e-09	96.111	By MS/MS	By MS/MS	By MS/MS	By MS/MS	3	1	1
KDTFFLTVHDAILYLQNQVK	IEKLEQCGFFDDNIRKDTFFLTVHDAILYL	LTVHDAILYLQNQVKSQEGQGSILETITLI	R	K	D	V	K	S	1	0	1	2	0	2	0	0	1	1	3	2	0	2	0	0	2	0	1	2	0	0	20	1	2392.28	sp|Pendrin(SLC26A4)R409H|	sp|Pendrin(SLC26A4)R409H|	715	734	yes	yes	4	8.9281e-51	122.22	By MS/MS	By MS/MS			1	1
LEQCGFFDDNIR	VNVYFASLQDYVIEKLEQCGFFDDNIRKDT	IEKLEQCGFFDDNIRKDTFFLTVHDAILYL	K	L	E	I	R	K	0	1	1	2	1	1	1	1	0	1	1	0	0	2	0	0	0	0	0	0	0	0	12	0	1512.67	sp|Pendrin(SLC26A4)R409H|	sp|Pendrin(SLC26A4)R409H|	703	714	yes	yes	2;3	8.1429e-283	222	By MS/MS	By MS/MS	By MS/MS	By MS/MS	4	4	3
LEQCGFFDDNIRK	VNVYFASLQDYVIEKLEQCGFFDDNIRKDT	EKLEQCGFFDDNIRKDTFFLTVHDAILYLQ	K	L	E	R	K	D	0	1	1	2	1	1	1	1	0	1	1	1	0	2	0	0	0	0	0	0	0	0	13	1	1640.76	sp|Pendrin(SLC26A4)R409H|	sp|Pendrin(SLC26A4)R409H|	703	715	yes	yes	3	2.556e-08	72.659	By MS/MS	By MS/MS	By matching	By MS/MS	1	1	1
NIEEPQGVK	SIPSTDIYKSTKNYKNIEEPQGVKILRFSS	STKNYKNIEEPQGVKILRFSSPIFYGNVDG	K	N	I	V	K	I	0	0	1	0	0	1	2	1	0	1	0	1	0	0	1	0	0	0	0	1	0	0	9	0	1012.52	sp|Pendrin(SLC26A4)R409H|	sp|Pendrin(SLC26A4)R409H|	538	546	yes	yes	2	4.2616e-10	97.093	By MS/MS	By MS/MS	By MS/MS	By MS/MS	4	3	1
NIEEPQGVKILR	SIPSTDIYKSTKNYKNIEEPQGVKILRFSS	NYKNIEEPQGVKILRFSSPIFYGNVDGFKK	K	N	I	L	R	F	0	1	1	0	0	1	2	1	0	2	1	1	0	0	1	0	0	0	0	1	0	0	12	1	1394.79	sp|Pendrin(SLC26A4)R409H|	sp|Pendrin(SLC26A4)R409H|	538	549	yes	yes	2;3	7.4503e-10	83.045	By MS/MS	By MS/MS	By matching	By matching	3	3	2
NYKNIEEPQGVK	GLGSIPSTDIYKSTKNYKNIEEPQGVKILR	STKNYKNIEEPQGVKILRFSSPIFYGNVDG	K	N	Y	V	K	I	0	0	2	0	0	1	2	1	0	1	0	2	0	0	1	0	0	0	1	1	0	0	12	1	1417.72	sp|Pendrin(SLC26A4)R409H|	sp|Pendrin(SLC26A4)R409H|	535	546	yes	yes	2;3	2.1773e-05	54.982	By MS/MS	By MS/MS			1	1
NYNAGIVK	TIIATAISYGANLEKNYNAGIVKSIPRGFL	YGANLEKNYNAGIVKSIPRGFLPPELPPVS	K	N	Y	V	K	S	1	0	2	0	0	0	0	1	0	1	0	1	0	0	0	0	0	0	1	1	0	0	8	0	877.466	sp|Pendrin(SLC26A4)R409H|	sp|Pendrin(SLC26A4)R409H|	322	329	yes	yes	1;2	2.8478e-06	88.029	By MS/MS	By MS/MS	By MS/MS	By MS/MS	2	2	2
NYNAGIVKSIPR	TIIATAISYGANLEKNYNAGIVKSIPRGFL	LEKNYNAGIVKSIPRGFLPPELPPVSLFSE	K	N	Y	P	R	G	1	1	2	0	0	0	0	1	0	2	0	1	0	0	1	1	0	0	1	1	0	0	12	1	1330.74	sp|Pendrin(SLC26A4)R409H|	sp|Pendrin(SLC26A4)R409H|	322	333	yes	yes	2	3.4254e-07	68.893	By MS/MS	By matching			1	1
PVYSELAFQQQHER	PPQLPEYSCSYMVSRPVYSELAFQQQHERR	RPVYSELAFQQQHERRLQERKTLRESLAKC	R	P	V	E	R	R	1	1	0	0	0	3	2	0	1	0	1	0	0	1	1	1	0	0	1	1	0	0	14	0	1730.84	sp|Pendrin(SLC26A4)R409H|	sp|Pendrin(SLC26A4)R409H|	25	38	yes	yes	2;3	0	328	By MS/MS	By MS/MS	By MS/MS	By MS/MS	5	2	2
SEPPQLPEYSCSYMVSR	______________________________	PPQLPEYSCSYMVSRPVYSELAFQQQHERR	R	S	E	S	R	P	0	1	0	0	1	1	2	0	0	0	1	0	1	0	3	4	0	0	2	1	0	0	17	0	2028.89	sp|Pendrin(SLC26A4)R409H|	sp|Pendrin(SLC26A4)R409H|	8	24	yes	yes	2;3	6.2096e-207	196.11	By MS/MS	By MS/MS	By MS/MS	By MS/MS	4	3	4
SQEGQGSILETITLIQDCK	LTVHDAILYLQNQVKSQEGQGSILETITLI	QGSILETITLIQDCKDTLELIETELTEEEL	K	S	Q	C	K	D	0	0	0	1	1	3	2	2	0	3	2	1	0	0	0	2	2	0	0	0	0	0	19	0	2119.05	sp|Pendrin(SLC26A4)R409H|	sp|Pendrin(SLC26A4)R409H|	735	753	yes	yes	2;3	0	256.26	By MS/MS	By MS/MS	By MS/MS	By MS/MS	4	3	2
STVGFDAIR	PIFYGNVDGFKKCIKSTVGFDAIRVYNKRL	FKKCIKSTVGFDAIRVYNKRLKALRKIQKL	K	S	T	I	R	V	1	1	0	1	0	0	0	1	0	1	0	0	0	1	0	1	1	0	0	1	0	0	9	0	964.498	sp|Pendrin(SLC26A4)R409H|	sp|Pendrin(SLC26A4)R409H|	568	576	yes	yes	2	1.2344e-29	122.13	By MS/MS	By MS/MS	By MS/MS	By MS/MS	4	2	2
SVLAAVVIANLK	IAILALGKLLEPLQKSVLAAVVIANLKGMF	LQKSVLAAVVIANLKGMFMQLCDIPRLWRQ	K	S	V	L	K	G	3	0	1	0	0	0	0	0	0	1	2	1	0	0	0	1	0	0	0	3	0	0	12	0	1196.75	sp|Pendrin(SLC26A4)R409H|	sp|Pendrin(SLC26A4)R409H|	448	459	yes	yes	2;3	7.0072e-127	169.21	By MS/MS	By MS/MS	By MS/MS	By MS/MS	4	4	2
TLVPILEWLPK	KCCSCSRKRAFGVLKTLVPILEWLPKYRVK	GVLKTLVPILEWLPKYRVKEWLLSDVISGV	K	T	L	P	K	Y	0	0	0	0	0	0	1	0	0	1	3	1	0	0	2	0	1	1	0	1	0	0	11	0	1307.79	sp|Pendrin(SLC26A4)R409H|	sp|Pendrin(SLC26A4)R409H|	67	77	yes	yes	1;2;3	6.7456e-69	143.03	By MS/MS	By MS/MS	By MS/MS	By MS/MS	6	4	1
TLVPILEWLPKYR	KCCSCSRKRAFGVLKTLVPILEWLPKYRVK	LKTLVPILEWLPKYRVKEWLLSDVISGVST	K	T	L	Y	R	V	0	1	0	0	0	0	1	0	0	1	3	1	0	0	2	0	1	1	1	1	0	0	13	1	1626.95	sp|Pendrin(SLC26A4)R409H|	sp|Pendrin(SLC26A4)R409H|	67	79	yes	yes	3	4.4477e-14	93.959	By MS/MS	By MS/MS			1	1
VIVKEFQR	GAISFLDVVGVRSLRVIVKEFQRIDVNVYF	VGVRSLRVIVKEFQRIDVNVYFASLQDYVI	R	V	I	Q	R	I	0	1	0	0	0	1	1	0	0	1	0	1	0	1	0	0	0	0	0	2	0	0	8	1	1017.6	sp|Pendrin(SLC26A4)R409H|	sp|Pendrin(SLC26A4)R409H|	678	685	yes	yes	2	0.0047077	58.981	By MS/MS	By MS/MS			2	1
VPIHSLVLDCGAISFLDVVGVR	VDWNSELPVKVNVPKVPIHSLVLDCGAISF	LDCGAISFLDVVGVRSLRVIVKEFQRIDVN	K	V	P	V	R	S	1	1	0	2	1	0	0	2	1	2	3	0	0	1	1	2	0	0	0	5	0	0	22	0	2365.28	sp|Pendrin(SLC26A4)R409H|	sp|Pendrin(SLC26A4)R409H|	653	674	yes	yes	3	3.2224e-99	143.04	By MS/MS	By MS/MS		By MS/MS	1	1
VQFPSWNGLGSIPSTDIYK	LLAGLIFGLLTVVLRVQFPSWNGLGSIPST	SWNGLGSIPSTDIYKSTKNYKNIEEPQGVK	R	V	Q	Y	K	S	0	0	1	1	0	1	0	2	0	2	1	1	0	1	2	3	1	1	1	1	0	0	19	0	2108.06	sp|Pendrin(SLC26A4)R409H|	sp|Pendrin(SLC26A4)R409H|	513	531	yes	yes	2;3	5.5319e-89	146.59	By MS/MS	By MS/MS	By MS/MS	By MS/MS	2	2	2
YLADPLVGGFTTAAAFQVLVSQLK	IQLIFGGLQIGFIVRYLADPLVGGFTTAAA	FTTAAAFQVLVSQLKIVLNVSTKNYNGVLS	R	Y	L	L	K	I	4	0	0	1	0	2	0	2	0	0	4	1	0	2	1	1	2	0	1	3	0	0	24	0	2508.36	sp|Pendrin(SLC26A4)R409H|	sp|Pendrin(SLC26A4)R409H|	214	237	yes	yes	2;3	5.1438e-138	165.66	By MS/MS	By MS/MS			2	1
[truncated: 22 more columns]

## Sheet: GlyGly (K)Sites_R409H
GlyGly (K)Sites_R409H
Proteins	Positions within proteins	Leading proteins	Protein	Fasta headers	Localization prob	Score diff	PEP	Score	Delta score	Score for localization	Localization prob MG132-1	Score diff MG132-1	PEP MG132-1	Score MG132-1	Localization prob MG132-2	Score diff MG132-2	PEP MG132-2	Score MG132-2	Localization prob Vehicle-1	Score diff Vehicle-1	PEP Vehicle-1	Score Vehicle-1	Localization prob Vehicle-2	Score diff Vehicle-2	PEP Vehicle-2	Score Vehicle-2	Diagnostic peak	Number of GlyGly (K)	Amino acid	Sequence window	Modification window	Peptide window coverage	GlyGly (K) Probabilities	GlyGly (K) Score diffs	Position in peptide	Charge	Mass error [ppm]	Identification type MG132-1	Identification type MG132-2	Identification type Vehicle-1	Identification type Vehicle-2	Intensity	Intensity___1	Intensity___2	Intensity___3	Ratio mod/base	Intensity MG132-1	Intensity MG132-2	Intensity Vehicle-1
sp|Pendrin(SLC26A4)R409H|	546	sp|Pendrin(SLC26A4)R409H|	sp|Pendrin(SLC26A4)R409H|	sp|Pendrin (SLC26A4) R409H|	1	74.6842	7.45031e-10	83.045	83.045	74.684	1	74.6842	7.45031e-10	83.045	0	0		NaN	0	0		NaN	0	0		NaN		1	K	KSTKNYKNIEEPQGVKILRFSSPIFYGNVDG	X;X;X;X;X;X;X;X;X;X;X;X;X;X;X;GlyGly (K);X;X;X;X;X;X;X;X;X;X;X;X;X;X;X	XXXXXXXPPPPPPPPPPPPXXXXXXXXXXXX	NIEEPQGVK(1)ILR	NIEEPQGVK(75)ILR	9	2	0.7317	By MS/MS	By MS/MS	By matching	By matching	45144000	45144000	0	0	5.3255	23277000	8442600	3507200
sp|Pendrin(SLC26A4)R409H|	537	sp|Pendrin(SLC26A4)R409H|	sp|Pendrin(SLC26A4)R409H|	sp|Pendrin (SLC26A4) R409H|	0.999965	44.5249	2.17732e-05	54.982	50.683	52.391	0.999487	32.8956	2.17732e-05	54.982	0.999965	44.5249	0.000116167	52.391										1	K	GSIPSTDIYKSTKNYKNIEEPQGVKILRFSS	X;X;X;X;X;X;X;X;X;X;X;X;X;X;X;GlyGly (K);X;X;X;X;X;X;X;X;GlyGly (K);X;X;X;X;X;X	XXXXXXXXXXXXXPPPPPPPPPPPPXXXXXX	NYK(1)NIEEPQGVK	NYK(45)NIEEPQGVK(-45)	3	3	0.4096	By MS/MS	By MS/MS			17002000	17002000	0	0	NaN	6702500	0	0
sp|Pendrin(SLC26A4)R409H|	329	sp|Pendrin(SLC26A4)R409H|	sp|Pendrin(SLC26A4)R409H|	sp|Pendrin (SLC26A4) R409H|	1	68.8931	3.42537e-07	68.893	68.893	68.893	1	68.8931	3.42537e-07	68.893	0	0		NaN										1	K	SYGANLEKNYNAGIVKSIPRGFLPPELPPVS	X;X;X;X;X;X;X;X;X;X;X;X;X;X;X;GlyGly (K);X;X;X;X;X;X;X;X;X;X;X;X;X;X;X	XXXXXXXXPPPPPPPPPPPPXXXXXXXXXXX	NYNAGIVK(1)SIPR	NYNAGIVK(69)SIPR	8	2	-0.025366	By MS/MS	By matching			3394600	3394600	0	0	NaN	2091700	1302900	0
sp|Pendrin(SLC26A4)R409H|	77	sp|Pendrin(SLC26A4)R409H|	sp|Pendrin(SLC26A4)R409H|	sp|Pendrin (SLC26A4) R409H|	1	49.4231	4.44773e-14	93.959	93.552	49.423	1	93.9595	4.44773e-14	93.959	1	49.4231	0.000302701	49.423										1	K	FGVLKTLVPILEWLPKYRVKEWLLSDVISGV	X;X;X;X;X;X;X;X;X;X;X;X;X;X;X;GlyGly (K);X;X;X;X;X;X;X;X;X;X;X;X;X;X;X	XXXXXPPPPPPPPPPPPPXXXXXXXXXXXXX	TLVPILEWLPK(1)YR	TLVPILEWLPK(49)YR	11	3	0.13735	By MS/MS	By MS/MS			30425000	30425000	0	0	NaN	23800000	6624500	0
sp|Pendrin(SLC26A4)R409H|	681	sp|Pendrin(SLC26A4)R409H|	sp|Pendrin(SLC26A4)R409H|	sp|Pendrin (SLC26A4) R409H|	1	56.0107	0.00470765	56.011	52.076	56.011	1	56.0107	0.00470765	56.011														1	K	SFLDVVGVRSLRVIVKEFQRIDVNVYFASLQ	X;X;X;X;X;X;X;X;X;X;X;X;X;X;X;GlyGly (K);X;X;X;X;X;X;X;X;X;X;X;X;X;X;X	XXXXXXXXXXXXPPPPPPPPXXXXXXXXXXX	VIVK(1)EFQR	VIVK(56)EFQR	4	2	0.006393	By MS/MS				5623300	5623300	0	0	0.75677	5623300	0	0
[truncated: 39 more columns]

## Sheet: proteinGroups_WT
proteinGroups_WT
Protein IDs	Majority protein IDs	Peptide counts (all)	Peptide counts (razor+unique)	Peptide counts (unique)	Fasta headers	Number of proteins	Peptides	Razor + unique peptides	Unique peptides	Peptides MG132-1	Peptides MG132-2	Peptides Vehicle-1	Peptides Vehicle-2	Razor + unique peptides MG132-1	Razor + unique peptides MG132-2	Razor + unique peptides Vehicle-1	Razor + unique peptides Vehicle-2	Unique peptides MG132-1	Unique peptides MG132-2	Unique peptides Vehicle-1	Unique peptides Vehicle-2	Sequence coverage [%]	Unique + razor sequence coverage [%]	Unique sequence coverage [%]	Mol. weight [kDa]	Sequence length	Sequence lengths	Q-value	Score	Identification type MG132-1	Identification type MG132-2	Identification type Vehicle-1	Identification type Vehicle-2	Sequence coverage MG132-1 [%]	Sequence coverage MG132-2 [%]	Sequence coverage Vehicle-1 [%]	Sequence coverage Vehicle-2 [%]	Intensity	Intensity MG132-1	Intensity MG132-2	Intensity Vehicle-1	Intensity Vehicle-2	iBAQ peptides	iBAQ	iBAQ MG132-1	iBAQ MG132-2	iBAQ Vehicle-1	iBAQ Vehicle-2	LFQ intensity MG132-1
NP_000432.1pendrin[Homosapiens]	NP_000432.1pendrin[Homosapiens]	28	28	28	NP_000432.1 pendrin [Homo sapiens]	1	28	28	28	25	26	28	26	25	26	28	26	25	26	28	26	39.5	39.5	39.5	85.722	780	780	0	323.31	By MS/MS	By MS/MS	By MS/MS	By MS/MS	39.2	39.2	39.5	39.1	135940000000	26915000000	41385000000	50898000000	16745000000	25	5437700000	1076600000	1655400000	2035900000	669800000	25217000000
[truncated: 23 more columns]

## Sheet: peptides_WT
peptides_WT
Sequence	N-term cleavage window	C-term cleavage window	Amino acid before	First amino acid	Second amino acid	Second last amino acid	Last amino acid	Amino acid after	A Count	R Count	N Count	D Count	C Count	Q Count	E Count	G Count	H Count	I Count	L Count	K Count	M Count	F Count	P Count	S Count	T Count	W Count	Y Count	V Count	U Count	O Count	Length	Missed cleavages	Mass	Proteins	Leading razor protein	Start position	End position	Unique (Groups)	Unique (Proteins)	Charges	PEP	Score	Identification type MG132-1	Identification type MG132-2	Identification type Vehicle-1	Identification type Vehicle-2	Experiment MG132-1	Experiment MG132-2	Experiment Vehicle-1
DTFFLTVHDAILYLQNQVK	EKLEQCGFFDDNIRKDTFFLTVHDAILYLQ	LTVHDAILYLQNQVKSQEGQGSILETITLI	K	D	T	V	K	S	1	0	1	2	0	2	0	0	1	1	3	1	0	2	0	0	2	0	1	2	0	0	19	0	2264.18	NP_000432.1pendrin[Homosapiens]	NP_000432.1pendrin[Homosapiens]	716	734	yes	yes	3	2.8121e-266	228.99	By MS/MS	By MS/MS	By MS/MS	By MS/MS	1	1	1
DTLELIETELTEEELDVQDEAMR	QGSILETITLIQDCKDTLELIETELTEEEL	ELTEEELDVQDEAMRTLAS___________	K	D	T	M	R	T	1	1	0	3	0	1	7	0	0	1	4	0	1	0	0	0	3	0	0	1	0	0	23	0	2720.26	NP_000432.1pendrin[Homosapiens]	NP_000432.1pendrin[Homosapiens]	754	776	yes	yes	2;3	0	388.36	By MS/MS	By MS/MS	By MS/MS	By MS/MS	3	3	2
EIEIQVDWNSELPVK	DEDIEDLEELDIPTKEIEIQVDWNSELPVK	EIEIQVDWNSELPVKVNVPKVPIHSLVLDC	K	E	I	V	K	V	0	0	1	1	0	1	3	0	0	2	1	1	0	0	1	1	0	1	0	2	0	0	15	0	1797.91	NP_000432.1pendrin[Homosapiens]	NP_000432.1pendrin[Homosapiens]	633	647	yes	yes	2;3	1.0019e-94	162.26	By MS/MS	By MS/MS	By MS/MS	By MS/MS	1	3	1
FSSPIFYGNVDGFK	NYKNIEEPQGVKILRFSSPIFYGNVDGFKK	RFSSPIFYGNVDGFKKCIKSTVGFDAIRVY	R	F	S	F	K	K	0	0	1	1	0	0	0	2	0	1	0	1	0	3	1	2	0	0	1	1	0	0	14	0	1576.76	NP_000432.1pendrin[Homosapiens]	NP_000432.1pendrin[Homosapiens]	550	563	yes	yes	2;3	1.2257e-48	131.42	By MS/MS	By MS/MS	By MS/MS	By MS/MS	5	4	5
FSSPIFYGNVDGFKK	NYKNIEEPQGVKILRFSSPIFYGNVDGFKK	FSSPIFYGNVDGFKKCIKSTVGFDAIRVYN	R	F	S	K	K	C	0	0	1	1	0	0	0	2	0	1	0	2	0	3	1	2	0	0	1	1	0	0	15	1	1704.85	NP_000432.1pendrin[Homosapiens]	NP_000432.1pendrin[Homosapiens]	550	564	yes	yes	2;3	5.592e-95	160.48	By MS/MS	By MS/MS	By MS/MS	By MS/MS	4	4	6
GMFMQLCDIPR	LQKSVLAAVVIANLKGMFMQLCDIPRLWRQ	ANLKGMFMQLCDIPRLWRQNKIDAVIWVFT	K	G	M	P	R	L	0	1	0	1	1	1	0	1	0	1	1	0	2	1	1	0	0	0	0	0	0	0	11	0	1366.62	NP_000432.1pendrin[Homosapiens]	NP_000432.1pendrin[Homosapiens]	460	470	yes	yes	2	1.0018e-70	154.49	By MS/MS	By MS/MS	By MS/MS	By MS/MS	9	14	22
IDVNVYFASLQDYVIEK	VGVRSLRVIVKEFQRIDVNVYFASLQDYVI	VNVYFASLQDYVIEKLEQCGFFDDNIRKDT	R	I	D	E	K	L	1	0	1	2	0	1	1	0	0	2	1	1	0	1	0	1	0	0	2	3	0	0	17	0	2015.03	NP_000432.1pendrin[Homosapiens]	NP_000432.1pendrin[Homosapiens]	686	702	yes	yes	2	1.2305e-78	150.16	By MS/MS	By MS/MS	By MS/MS	By MS/MS	1	1	1
IVLNVSTK	FTTAAAFQVLVSQLKIVLNVSTKNYNGVLS	VLVSQLKIVLNVSTKNYNGVLSIIYTLVEI	K	I	V	T	K	N	0	0	1	0	0	0	0	0	0	1	1	1	0	0	0	1	1	0	0	2	0	0	8	0	872.533	NP_000432.1pendrin[Homosapiens]	NP_000432.1pendrin[Homosapiens]	238	245	yes	yes	2	1.3777e-21	117.1	By MS/MS	By MS/MS	By MS/MS	By MS/MS	1	1	1
KDTFFLTVHDAILYLQNQVK	IEKLEQCGFFDDNIRKDTFFLTVHDAILYL	LTVHDAILYLQNQVKSQEGQGSILETITLI	R	K	D	V	K	S	1	0	1	2	0	2	0	0	1	1	3	2	0	2	0	0	2	0	1	2	0	0	20	1	2392.28	NP_000432.1pendrin[Homosapiens]	NP_000432.1pendrin[Homosapiens]	715	734	yes	yes	4	2.603e-39	118.72		By MS/MS	By MS/MS	By MS/MS		1	1
LEQCGFFDDNIR	VNVYFASLQDYVIEKLEQCGFFDDNIRKDT	IEKLEQCGFFDDNIRKDTFFLTVHDAILYL	K	L	E	I	R	K	0	1	1	2	1	1	1	1	0	1	1	0	0	2	0	0	0	0	0	0	0	0	12	0	1512.67	NP_000432.1pendrin[Homosapiens]	NP_000432.1pendrin[Homosapiens]	703	714	yes	yes	2;3	1.5559e-285	243.65	By MS/MS	By MS/MS	By MS/MS	By MS/MS	5	5	5
LEQCGFFDDNIRK	VNVYFASLQDYVIEKLEQCGFFDDNIRKDT	EKLEQCGFFDDNIRKDTFFLTVHDAILYLQ	K	L	E	R	K	D	0	1	1	2	1	1	1	1	0	1	1	1	0	2	0	0	0	0	0	0	0	0	13	1	1640.76	NP_000432.1pendrin[Homosapiens]	NP_000432.1pendrin[Homosapiens]	703	715	yes	yes	2;3	4.8031e-37	122.55	By MS/MS	By MS/MS	By MS/MS	By MS/MS	2	2	2
NIEEPQGVK	SIPSTDIYKSTKNYKNIEEPQGVKILRFSS	STKNYKNIEEPQGVKILRFSSPIFYGNVDG	K	N	I	V	K	I	0	0	1	0	0	1	2	1	0	1	0	1	0	0	1	0	0	0	0	1	0	0	9	0	1012.52	NP_000432.1pendrin[Homosapiens]	NP_000432.1pendrin[Homosapiens]	538	546	yes	yes	2	7.5591e-10	97.093	By MS/MS	By MS/MS	By MS/MS	By MS/MS	2	1	4
NIEEPQGVKILR	SIPSTDIYKSTKNYKNIEEPQGVKILRFSS	NYKNIEEPQGVKILRFSSPIFYGNVDGFKK	K	N	I	L	R	F	0	1	1	0	0	1	2	1	0	2	1	1	0	0	1	0	0	0	0	1	0	0	12	1	1394.79	NP_000432.1pendrin[Homosapiens]	NP_000432.1pendrin[Homosapiens]	538	549	yes	yes	2;3	1.8902e-13	90.629	By matching	By matching	By MS/MS	By MS/MS	1	1	3
NYKNIEEPQGVK	GLGSIPSTDIYKSTKNYKNIEEPQGVKILR	STKNYKNIEEPQGVKILRFSSPIFYGNVDG	K	N	Y	V	K	I	0	0	2	0	0	1	2	1	0	1	0	2	0	0	1	0	0	0	1	1	0	0	12	1	1417.72	NP_000432.1pendrin[Homosapiens]	NP_000432.1pendrin[Homosapiens]	535	546	yes	yes	3	4.0065e-09	81.625	By MS/MS	By MS/MS	By MS/MS		1	1	1
NYNAGIVK	TIIATAISYGANLEKNYNAGIVKSIPRGFL	YGANLEKNYNAGIVKSIPRGFLPPELPPVS	K	N	Y	V	K	S	1	0	2	0	0	0	0	1	0	1	0	1	0	0	0	0	0	0	1	1	0	0	8	0	877.466	NP_000432.1pendrin[Homosapiens]	NP_000432.1pendrin[Homosapiens]	322	329	yes	yes	2	1.3779e-05	83.377	By MS/MS	By MS/MS	By MS/MS	By MS/MS	3	1	2
PVYSELAFQQQHER	PPQLPEYSCSYMVSRPVYSELAFQQQHERR	RPVYSELAFQQQHERRLQERKTLRESLAKC	R	P	V	E	R	R	1	1	0	0	0	3	2	0	1	0	1	0	0	1	1	1	0	0	1	1	0	0	14	0	1730.84	NP_000432.1pendrin[Homosapiens]	NP_000432.1pendrin[Homosapiens]	25	38	yes	yes	2;3;4	0	315.2	By MS/MS	By MS/MS	By MS/MS	By MS/MS	7	7	5
RAFGVLK	TLRESLAKCCSCSRKRAFGVLKTLVPILEW	KCCSCSRKRAFGVLKTLVPILEWLPKYRVK	K	R	A	L	K	T	1	1	0	0	0	0	0	1	0	0	1	1	0	1	0	0	0	0	0	1	0	0	7	1	789.486	NP_000432.1pendrin[Homosapiens]	NP_000432.1pendrin[Homosapiens]	60	66	yes	yes	2	0.003093	62.715	By MS/MS	By MS/MS	By MS/MS	By MS/MS	1	1	1
SEPPQLPEYSCSYMVSR	______________________________	PPQLPEYSCSYMVSRPVYSELAFQQQHERR	R	S	E	S	R	P	0	1	0	0	1	1	2	0	0	0	1	0	1	0	3	4	0	0	2	1	0	0	17	0	2028.89	NP_000432.1pendrin[Homosapiens]	NP_000432.1pendrin[Homosapiens]	8	24	yes	yes	2;3	1.4743e-135	178.22	By MS/MS	By MS/MS	By MS/MS	By MS/MS	3	4	4
SEPPQLPEYSCSYMVSRPVYSELAFQQQHER	______________________________	RPVYSELAFQQQHERRLQERKTLRESLAKC	R	S	E	E	R	R	1	2	0	0	1	4	4	0	1	0	2	0	1	1	4	5	0	0	3	2	0	0	31	1	3741.72	NP_000432.1pendrin[Homosapiens]	NP_000432.1pendrin[Homosapiens]	8	38	yes	yes	4	1.8572e-22	92.822			By MS/MS				1
SQEGQGSILETITLIQDCK	LTVHDAILYLQNQVKSQEGQGSILETITLI	QGSILETITLIQDCKDTLELIETELTEEEL	K	S	Q	C	K	D	0	0	0	1	1	3	2	2	0	3	2	1	0	0	0	2	2	0	0	0	0	0	19	0	2119.05	NP_000432.1pendrin[Homosapiens]	NP_000432.1pendrin[Homosapiens]	735	753	yes	yes	2;3	0	264.92	By MS/MS	By MS/MS	By MS/MS	By MS/MS	2	2	3
STVGFDAIR	PIFYGNVDGFKKCIKSTVGFDAIRVYNKRL	FKKCIKSTVGFDAIRVYNKRLKALRKIQKL	K	S	T	I	R	V	1	1	0	1	0	0	0	1	0	1	0	0	0	1	0	1	1	0	0	1	0	0	9	0	964.498	NP_000432.1pendrin[Homosapiens]	NP_000432.1pendrin[Homosapiens]	568	576	yes	yes	2	2.389e-41	135.84	By MS/MS	By MS/MS	By MS/MS	By MS/MS	6	5	7
SVLAAVVIANLK	IAILALGKLLEPLQKSVLAAVVIANLKGMF	LQKSVLAAVVIANLKGMFMQLCDIPRLWRQ	K	S	V	L	K	G	3	0	1	0	0	0	0	0	0	1	2	1	0	0	0	1	0	0	0	3	0	0	12	0	1196.75	NP_000432.1pendrin[Homosapiens]	NP_000432.1pendrin[Homosapiens]	448	459	yes	yes	2;3	8.5177e-129	177.91	By MS/MS	By MS/MS	By MS/MS	By MS/MS	3	4	4
TLVPILEWLPK	KCCSCSRKRAFGVLKTLVPILEWLPKYRVK	GVLKTLVPILEWLPKYRVKEWLLSDVISGV	K	T	L	P	K	Y	0	0	0	0	0	0	1	0	0	1	3	1	0	0	2	0	1	1	0	1	0	0	11	0	1307.79	NP_000432.1pendrin[Homosapiens]	NP_000432.1pendrin[Homosapiens]	67	77	yes	yes	1;2	1.9316e-05	75.294	By MS/MS	By MS/MS	By MS/MS	By MS/MS	4	6	5
TLVPILEWLPKYR	KCCSCSRKRAFGVLKTLVPILEWLPKYRVK	LKTLVPILEWLPKYRVKEWLLSDVISGVST	K	T	L	Y	R	V	0	1	0	0	0	0	1	0	0	1	3	1	0	0	2	0	1	1	1	1	0	0	13	1	1626.95	NP_000432.1pendrin[Homosapiens]	NP_000432.1pendrin[Homosapiens]	67	79	yes	yes	3	0.001041	43.382			By MS/MS	By matching			1
VIVKEFQR	GAISFLDVVGVRSLRVIVKEFQRIDVNVYF	VGVRSLRVIVKEFQRIDVNVYFASLQDYVI	R	V	I	Q	R	I	0	1	0	0	0	1	1	0	0	1	0	1	0	1	0	0	0	0	0	2	0	0	8	1	1017.6	NP_000432.1pendrin[Homosapiens]	NP_000432.1pendrin[Homosapiens]	678	685	yes	yes	2;3	4.3722e-06	86.794	By MS/MS	By MS/MS	By MS/MS	By MS/MS	1	1	3
VPIHSLVLDCGAISFLDVVGVR	VDWNSELPVKVNVPKVPIHSLVLDCGAISF	LDCGAISFLDVVGVRSLRVIVKEFQRIDVN	K	V	P	V	R	S	1	1	0	2	1	0	0	2	1	2	3	0	0	1	1	2	0	0	0	5	0	0	22	0	2365.28	NP_000432.1pendrin[Homosapiens]	NP_000432.1pendrin[Homosapiens]	653	674	yes	yes	3;4	1.0297e-66	143.04	By MS/MS	By MS/MS	By MS/MS	By MS/MS	1	1	3
VQFPSWNGLGSIPSTDIYK	LLAGLIFGLLTVVLRVQFPSWNGLGSIPST	SWNGLGSIPSTDIYKSTKNYKNIEEPQGVK	R	V	Q	Y	K	S	0	0	1	1	0	1	0	2	0	2	1	1	0	1	2	3	1	1	1	1	0	0	19	0	2108.06	NP_000432.1pendrin[Homosapiens]	NP_000432.1pendrin[Homosapiens]	513	531	yes	yes	2;3	7.1439e-80	156.6	By MS/MS	By MS/MS	By MS/MS	By MS/MS	2	2	2
YLADPLVGGFTTAAAFQVLVSQLK	IQLIFGGLQIGFIVRYLADPLVGGFTTAAA	FTTAAAFQVLVSQLKIVLNVSTKNYNGVLS	R	Y	L	L	K	I	4	0	0	1	0	2	0	2	0	0	4	1	0	2	1	1	2	0	1	3	0	0	24	0	2508.36	NP_000432.1pendrin[Homosapiens]	NP_000432.1pendrin[Homosapiens]	214	237	yes	yes	2;3	3.0264e-164	189.11	By MS/MS	By MS/MS	By MS/MS	By MS/MS	2	2	2
[truncated: 22 more columns]

## Sheet: GlyGly (K)Sites_WT
GlyGly (K)Sites_WT
Proteins	Positions within proteins	Leading proteins	Protein	Fasta headers	Localization prob	Score diff	PEP	Score	Delta score	Score for localization	Localization prob MG132-1	Score diff MG132-1	PEP MG132-1	Score MG132-1	Localization prob MG132-2	Score diff MG132-2	PEP MG132-2	Score MG132-2	Localization prob Vehicle-1	Score diff Vehicle-1	PEP Vehicle-1	Score Vehicle-1	Localization prob Vehicle-2	Score diff Vehicle-2	PEP Vehicle-2	Score Vehicle-2	Diagnostic peak	Number of GlyGly (K)	Amino acid	Sequence window	Modification window	Peptide window coverage	GlyGly (K) Probabilities	GlyGly (K) Score diffs	Position in peptide	Charge	Mass error [ppm]	Identification type MG132-1	Identification type MG132-2	Identification type Vehicle-1	Identification type Vehicle-2	Intensity	Intensity___1	Intensity___2	Intensity___3	Ratio mod/base	Intensity MG132-1	Intensity MG132-2	Intensity Vehicle-1
NP_000432.1pendrin[Homosapiens]	563	NP_000432.1pendrin[Homosapiens]	NP_000432.1pendrin[Homosapiens]	NP_000432.1 pendrin [Homo sapiens]	0.5	0	0.00456841	56.783	50.811	56.783	0	0		NaN	0	0		NaN	0.5	0	0.00456841	56.783	0	0		NaN		1	K	LRFSSPIFYGNVDGFKKCIKSTVGFDAIRVY	X;X;X;X;X;X;X;X;X;X;X;X;X;X;X;GlyGly (K);X;X;X;X;X;X;X;X;X;X;X;X;X;X;X	XXPPPPPPPPPPPPPPPXXXXXXXXXXXXXX	FSSPIFYGNVDGFK(0.5)K(0.5)	FSSPIFYGNVDGFK(0)K(0)	14	2	-0.48291			By MS/MS		4278600	4278600	0	0	0.0033509	0	0	4278600
NP_000432.1pendrin[Homosapiens]	564	NP_000432.1pendrin[Homosapiens]	NP_000432.1pendrin[Homosapiens]	NP_000432.1 pendrin [Homo sapiens]	0.531306	0.544552	0.00158318	56.783	50.811	46.408	0	0		NaN	0	0		NaN	0.531306	0.544552	0.00158318	56.783	0	0		NaN		1	K	RFSSPIFYGNVDGFKKCIKSTVGFDAIRVYN	X;X;X;X;X;X;X;X;X;X;X;X;X;X;X;GlyGly (K);X;X;X;X;X;X;X;X;X;X;X;X;X;X;X	XPPPPPPPPPPPPPPPXXXXXXXXXXXXXXX	FSSPIFYGNVDGFK(0.469)K(0.531)	FSSPIFYGNVDGFK(-0.54)K(0.54)	15	3	0.58734	By matching	By matching	By MS/MS	By matching	71403000	71403000	0	0	0.055921	7963500	15378000	34506000
NP_000432.1pendrin[Homosapiens]	546	NP_000432.1pendrin[Homosapiens]	NP_000432.1pendrin[Homosapiens]	NP_000432.1 pendrin [Homo sapiens]	1	90.6291	1.89018e-13	90.629	90.629	90.629	0	0		NaN	0	0		NaN	1	90.6291	1.89018e-13	90.629	0	0		NaN		1	K	KSTKNYKNIEEPQGVKILRFSSPIFYGNVDG	X;X;X;X;X;X;X;X;X;X;X;X;X;X;X;GlyGly (K);X;X;X;X;X;X;X;X;X;X;X;X;X;X;X	XXXXXXXPPPPPPPPPPPPXXXXXXXXXXXX	NIEEPQGVK(1)ILR	NIEEPQGVK(91)ILR	9	2	0.18751	By matching	By matching	By MS/MS	By MS/MS	72804000	72804000	0	0	10.132	10152000	15218000	32186000
NP_000432.1pendrin[Homosapiens]	537	NP_000432.1pendrin[Homosapiens]	NP_000432.1pendrin[Homosapiens]	NP_000432.1 pendrin [Homo sapiens]	1	72.1871	4.00653e-09	81.625	79.612	81.625	0.999961	44.1326	0.000213618	51.998	1	70.6118	1.00862e-06	76.332	1	72.1871	4.00653e-09	81.625						1	K	GSIPSTDIYKSTKNYKNIEEPQGVKILRFSS	X;X;X;X;X;X;X;X;X;X;X;X;X;X;X;GlyGly (K);X;X;X;X;X;X;X;X;GlyGly (K);X;X;X;X;X;X	XXXXXXXXXXXXXPPPPPPPPPPPPXXXXXX	NYK(1)NIEEPQGVK	NYK(72)NIEEPQGVK(-72)	3	3	-1.1269	By MS/MS	By MS/MS	By MS/MS		59523000	59523000	0	0	NaN	13275000	18856000	27393000
NP_000432.1pendrin[Homosapiens]	77	NP_000432.1pendrin[Homosapiens]	NP_000432.1pendrin[Homosapiens]	NP_000432.1 pendrin [Homo sapiens]	1	43.3824	0.00104097	43.382	43.118	43.382									1	43.3824	0.00104097	43.382	0	0		NaN		1	K	FGVLKTLVPILEWLPKYRVKEWLLSDVISGV	X;X;X;X;X;X;X;X;X;X;X;X;X;X;X;GlyGly (K);X;X;X;X;X;X;X;X;X;X;X;X;X;X;X	XXXXXPPPPPPPPPPPPPXXXXXXXXXXXXX	TLVPILEWLPK(1)YR	TLVPILEWLPK(43)YR	11	3	0.15827			By MS/MS	By matching	12771000	12771000	0	0	NaN	0	0	9569300
NP_000432.1pendrin[Homosapiens]	681	NP_000432.1pendrin[Homosapiens]	NP_000432.1pendrin[Homosapiens]	NP_000432.1 pendrin [Homo sapiens]	1	54.1572	4.37225e-06	86.794	72.127	54.157									1	46.4258	4.37225e-06	86.794	1	54.1572	0.00538709	54.157		1	K	SFLDVVGVRSLRVIVKEFQRIDVNVYFASLQ	X;X;X;X;X;X;X;X;X;X;X;X;X;X;X;GlyGly (K);X;X;X;X;X;X;X;X;X;X;X;X;X;X;X	XXXXXXXXXXXXPPPPPPPPXXXXXXXXXXX	VIVK(1)EFQR	VIVK(54)EFQR	4	3	0.072363			By MS/MS	By MS/MS	11069000	11069000	0	0	0.75701	0	0	7445000
[truncated: 39 more columns]
